# Supplementary material for: Personalized Genetic Risk Counseling to Motivate Diabetes Prevention
Source: Oxford University Press journal article supplement (doi:10.2337/dc12-0884), 2012-08-30
Supplement: dc120884supplementarydata.doc [file dc120884supplementarydata.doc]

**
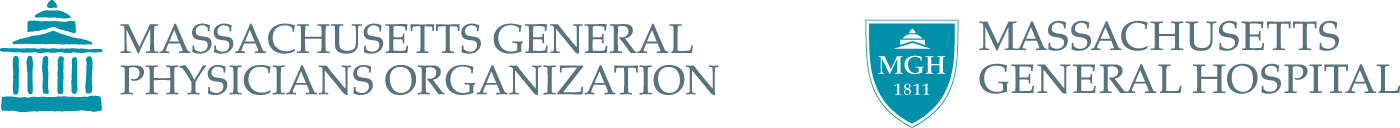

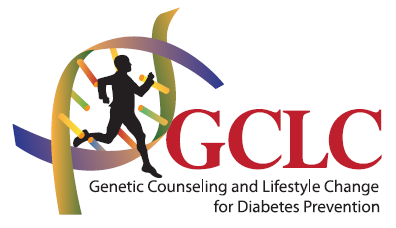
**

**DIABETES GENETIC TESTING REPORT**

PATIENT NAME: Test Patient DATE OF TEST: 02/26/2010

**GENETIC RISK SCORE:** **40/72** PATIENT STUDY ID: 006

| # | **SNP** | **CHROMOSOME** | **NEAREST GENE** | **RISK** |
| --- | --- | --- | --- | --- |
| 1 | rs7578326 | 2 | IRS1 | **HIGH** |
| 2 | rs243021 | 2 | BCL11A | **HIGH** |
| 3 | rs1801282 | 3 | PPARg | **HIGH** |
| 4 | rs11708067 | 3 | ADCY5 | **HIGH** |
| 5 | rs10010131 | 4 | WFS1 | **HIGH** |
| 6 | rs4457053 | 5 | ZBED3 | **HIGH** |
| 7 | rs2191348 | 7 | DGKB/TMEM195 | **HIGH** |
| 8 | rs13266634 | 8 | SLC30A8 | **HIGH** |
| 9 | rs13292136 | 9 | TLE4 | **HIGH** |
| 10 | rs231362 | 11 | KCNQ1 | **HIGH** |
| 11 | rs1552224 | 11 | CENTD2 | **HIGH** |
| 12 | rs1153188 | 12 | DCD | **HIGH** |
| 13 | rs11634397 | 15 | ZFAND6 | **HIGH** |
| 14 | rs780094 | 2 | GCKR | MODERATE |
| 15 | rs1470580 | 3 | IGF2BP2 | MODERATE |
| 16 | rs4607103 | 3 | ADAMTS9 | MODERATE |
| 17 | rs7754840 | 6 | CDKAL1 | MODERATE |
| 18 | rs972283 | 7 | KLF14 | MODERATE |
| 19 | rs864745 | 7 | JAZF1 | MODERATE |
| 20 | rs896854 | 8 | TP53INP1 | MODERATE |
| 21 | rs12779790 | 10 | CDC123, CAMK1D | MODERATE |
| 22 | rs1111875 | 10 | HHEX | MODERATE |
| 23 | rs7903146 | 10 | TCF7L2 | MODERATE |
| 24 | rs5219 | 11 | KCNJ11 | MODERATE |
| 25 | rs7957197 | 12 | OASL/TCF1 | MODERATE |
| 26 | rs8042680 | 15 | PRC1 | MODERATE |
| 27 | rs757210 | 17 | HNF1B | MODERATE |
| 28 | rs340874 | 1 | PROX1 | LOW |
| 29 | rs10923931 | 1 | NOTCH2 | LOW |
| 30 | rs9472138 | 6 | VEGFA | LOW |
| 31 | rs4607517 | 7 | GCK | LOW |
| 32 | rs10811661 | 9 | CDKNA/2B | LOW |
| 33 | rs10830963 | 11 | MTNR1B | LOW |
| 34 | rs7961581 | 12 | TSPAN8,LGR5 | LOW |
| 35 | rs1531343 | 12 | HMGA2 | LOW |
| 36 | rs9939609 | 16 | FTO | LOW |

INTERPRETATION: 40/72 indicates a **HIGHER GENETIC RISK** for developing diabetes

TEST INFORMATION: DNA extraction and genotyping was performed at the Broad Institute in Cambridge, MA under the direction of Dr. Jose Florez by plexing SNPs into an array, then using allele-specific primer extension of multiplex amplified products with detection by matrix-assisted laser desorption ionization-time for flight mass spectroscopy on the iPLEX Sequenom Gold platform. This test is not yet approved for clinical care.
